# Supplementary material for: Impact of Freezing on the Microbiological Quality and Physical Characteristics of Buffalo Mozzarella Cheese
Source: MDPI journal article supplement (doi:10.3390/ani11123502), 2021-12-08
Supplement: s1 [file s1]

## SUPPLEMENTARY FILES

*Impact of freezing on the microbiological quality and physical characteristics of buffalo mozzarella cheese.*

**Loredana Biondi<sup>1,\*</sup>, Andrea Fulgione<sup>1,\*</sup>, Federico Capuano<sup>1-3</sup>, Morena Nappa<sup>1</sup>, Angelo Citro<sup>2-3</sup>, Donatella Nava<sup>1,\*</sup>.**

<sup>1</sup>Department of Food Inspection, Istituto Zooprofilattico Sperimentale del Mezzogiorno, 80055 Portici, Naples, Italy; [loredana.biondi@izsmportici.it](mailto:loredana.biondi@izsmportici.it); [andrea.fulgione@izsmportici.it](mailto:andrea.fulgione@izsmportici.it); [federico.capuano@cert.izsmportici.it](mailto:federico.capuano@cert.izsmportici.it); [morena.nappa@izsmportici.it](mailto:morena.nappa@izsmportici.it); [donatella.nava@cert.izsmportici.it](mailto:donatella.nava@cert.izsmportici.it))

<sup>2</sup>Veterinary Services, Local Health Unit of Salerno, 84025 Eboli, Salerno, Italy; ([vincenzocitro@inwind.it](mailto:vincenzocitro@inwind.it))

<sup>3</sup>Reference center for traditional agri-food products of the Campania Region (CRIPAT-PAT), 83100 Avellino, Italy; [federico.capuano@cert.izsmportici.it](mailto:federico.capuano@cert.izsmportici.it); [vincenzocitro@inwind.it](mailto:vincenzocitro@inwind.it))

\*Correspondence: [donatella.nava@cert.izsmportici.it](mailto:donatella.nava@cert.izsmportici.it); Phone: +39 081 7865338

<sup>†</sup>These authors contributed equally to the study.

Table S1. Microbiological data of thermised buffalo milk collected from different dairies. Each data represents the mean  $\pm$  SD of the different microbiological analyses, each performed in triplicate.

A) Total bacterial count

| Time (days) | Dairy X            | Dairy Y            | Dairy Z            |
|-------------|--------------------|--------------------|--------------------|
| 0           | 6.505 $\pm$ 0.0010 | 7.322 $\pm$ 0.0021 | 6.447 $\pm$ 0.0012 |
| 60          | 6.301 $\pm$ 0.0020 | 6.301 $\pm$ 0.0020 | 6.041 $\pm$ 0.0019 |
| 150         | 7.431 $\pm$ 0.0018 | 5.255 $\pm$ 0.0012 | 6.792 $\pm$ 0.0018 |
| 240         | 6.707 $\pm$ 0.0010 | 5.732 $\pm$ 0.0010 | 5.880 $\pm$ 0.0020 |
| 330         | 6.740 $\pm$ 0.0017 | 5.079 $\pm$ 0.0021 | 6.505 $\pm$ 0.0011 |

B) Coliforms

| Time (days) | Dairy X            | Dairy Y            | Dairy Z            |
|-------------|--------------------|--------------------|--------------------|
| 0           | 4.806 $\pm$ 0.0010 | 6.176 $\pm$ 0.0011 | 4.568 $\pm$ 0.0008 |
| 60          | 3.041 $\pm$ 0.0018 | 4 $\pm$ 0.0020     | 3.278 $\pm$ 0.0011 |
| 150         | 4.397 $\pm$ 0.0012 | 3.462 $\pm$ 0.0016 | 2.724 $\pm$ 0.0015 |
| 240         | 2.886 $\pm$ 0.0011 | 3.342 $\pm$ 0.0018 | 2.863 $\pm$ 0.0017 |
| 330         | 2.845 $\pm$ 0.0010 | 2.380 $\pm$ 0.0022 | 2.838 $\pm$ 0.0010 |

C) *Escherichia coli*

| Time (days) | Dairy X            | Dairy Y            | Dairy Z            |
|-------------|--------------------|--------------------|--------------------|
| 0           | 3.806 $\pm$ 0.0012 | 2.602 $\pm$ 0.0018 | 2.662 $\pm$ 0.0018 |
| 60          | 3.176 $\pm$ 0.0013 | 2.556 $\pm$ 0.0013 | 2.602 $\pm$ 0.0017 |
| 150         | 2.845 $\pm$ 0.0015 | 0.954 $\pm$ 0.0017 | 1.579 $\pm$ 0.0009 |
| 240         | 1.908 $\pm$ 0.0011 | 1.491 $\pm$ 0.0020 | 1.568 $\pm$ 0.0010 |
| 330         | 0.903 $\pm$ 0.0017 | 0.845 $\pm$ 0.0014 | 0.954 $\pm$ 0.0015 |

D) *Enterobacteriaceae*

| Time (days) | Dairy X            | Dairy Y            | Dairy Z            |
|-------------|--------------------|--------------------|--------------------|
| 0           | 4.653 $\pm$ 0.0016 | 6.113 $\pm$ 0.0018 | 4.778 $\pm$ 0.0011 |
| 60          | 3.176 $\pm$ 0.0009 | 4.342 $\pm$ 0.0017 | 2.869 $\pm$ 0.0002 |
| 150         | 4.255 $\pm$ 0.0012 | 3.176 $\pm$ 0.0007 | 3.041 $\pm$ 0.0018 |
| 240         | 2.799 $\pm$ 0.0008 | 3.431 $\pm$ 0.0015 | 3 $\pm$ 0.0019     |
| 330         | 3.041 $\pm$ 0.0019 | 2.255 $\pm$ 0.0011 | 2.954 $\pm$ 0.0011 |

E) Lactic acid bacteria

| Time (days) | Dairy X            | Dairy Y            | Dairy Z            |
|-------------|--------------------|--------------------|--------------------|
| 0           | 5.568 $\pm$ 0.0010 | 6.342 $\pm$ 0.0015 | 3.278 $\pm$ 0.0009 |
| 60          | 5.146 $\pm$ 0.0015 | 5.863 $\pm$ 0.0017 | 5.518 $\pm$ 0.0010 |
| 150         | 5.322 $\pm$ 0.0018 | 4.672 $\pm$ 0.0012 | 6.079 $\pm$ 0.0011 |
| 240         | 5.361 $\pm$ 0.0017 | 5.041 $\pm$ 0.0022 | 5.672 $\pm$ 0.0018 |
| 330         | 5.591 $\pm$ 0.0020 | 4.672 $\pm$ 0.0018 | 5.342 $\pm$ 0.0019 |

F) Coagulase-positive staphylococci

| Time (days) | Dairy X        | Dairy Y        | Dairy Z        |
|-------------|----------------|----------------|----------------|
| 0           | 0.903 ± 0.0015 | 0.954 ± 0.0008 | 2.556 ± 0.0015 |
| 60          | 0.698 ± 0.0008 | 2.204 ± 0.0015 | 1.863 ± 0.0021 |
| 150         | 2.204 ± 0.0016 | 1.740 ± 0.0018 | 1.591 ± 0.0017 |
| 240         | 0.698 ± 0.0009 | 1.740 ± 0.0019 | 1.579 ± 0.0004 |
| 330         | 0.477 ± 0.0010 | 2.913 ± 0.0017 | 1.568 ± 0.0009 |

G) *Pseudomonas* spp.

| Time (days) | Dairy X        | Dairy Y        | Dairy Z        |
|-------------|----------------|----------------|----------------|
| 0           | 1.954 ± 0.0015 | 1.991 ± 0.0020 | 7.204 ± 0.0015 |
| 60          | 5.342 ± 0.0018 | 4.113 ± 0.0018 | 5.880 ± 0.0020 |
| 150         | 5.568 ± 0.0010 | 4.146 ± 0.0010 | 6.079 ± 0.0008 |
| 240         | 1.954 ± 0.0016 | 4.518 ± 0.0009 | 5.431 ± 0.0010 |
| 330         | 3.633 ± 0.0019 | 3.819 ± 0.0010 | 5.602 ± 0.0011 |

H) Psychrotrophic

| Time (days) | Dairy X        | Dairy Y        | Dairy Z        |
|-------------|----------------|----------------|----------------|
| 0           | 6 ± 0.0018     | 6.477 ± 0.0012 | 7.113 ± 0.0022 |
| 60          | 5.982 ± 0.0019 | 5.204 ± 0.0013 | 6.079 ± 0.0010 |
| 150         | 6.041 ± 0.0020 | 4.832 ± 0.0018 | 6.707 ± 0.0008 |
| 240         | 6.079 ± 0.0010 | 5.342 ± 0.0016 | 6.041 ± 0.0016 |
| 330         | 6.146 ± 0.0012 | 4.851 ± 0.0020 | 5.732 ± 0.0018 |

I) Yeasts

| Time (days) | Dairy X        | Dairy Y        | Dairy Z        |
|-------------|----------------|----------------|----------------|
| 0           | 3.278 ± 0.0008 | 0.954 ± 0.0016 | 3.255 ± 0.0015 |
| 60          | 3.477 ± 0.0010 | 2.599 ± 0.0010 | 2.799 ± 0.0009 |
| 150         | 3.255 ± 0.0012 | 2.598 ± 0.0011 | 3.041 ± 0.0020 |
| 240         | 2.591 ± 0.0020 | 3 ± 0.0020     | 3.204 ± 0.0017 |
| 330         | 2.662 ± 0.0018 | 2.596 ± 0.0007 | 3.732 ± 0.0018 |

J) Moulds

| Time (days) | Dairy X        | Dairy Y        | Dairy Z        |
|-------------|----------------|----------------|----------------|
| 0           | 4.041 ± 0.0018 | 0.954 ± 0.0017 | 1.995 ± 0.0011 |
| 60          | 1.986 ± 0.0008 | 1.995 ± 0.0019 | 2.592 ± 0.0020 |
| 150         | 2.592 ± 0.0016 | 1.986 ± 0.0012 | 2.591 ± 0.0022 |
| 240         | 1.991 ± 0.0019 | 1.991 ± 0.0020 | 1.986 ± 0.0013 |
| 330         | 1.982 ± 0.0018 | 2.596 ± 0.0012 | 1.977 ± 0.0010 |

Table S2. Microbiological data of pre-mature curd collected from different dairies. Each data represents the mean  $\pm$  SD of the different microbiological analyses, each performed in triplicate.

A) Total bacterial count

| Time (days) | Dairy X            | Dairy Y            | Dairy Z            |
|-------------|--------------------|--------------------|--------------------|
| 0           | 6.146 $\pm$ 0.0010 | 5.579 $\pm$ 0.0012 | 8.477 $\pm$ 0.0012 |
| 60          | 5.591 $\pm$ 0.0020 | 5.380 $\pm$ 0.0018 | 5.176 $\pm$ 0.0011 |
| 150         | 6 $\pm$ 0.0020     | 5.079 $\pm$ 0.0010 | 4.838 $\pm$ 0.0009 |
| 240         | 4.880 $\pm$ 0.0022 | 4.662 $\pm$ 0.0017 | 6.602 $\pm$ 0.0014 |
| 330         | 5.568 $\pm$ 0.0011 | 4.653 $\pm$ 0.0015 | 6.973 $\pm$ 0.0016 |

B) Coliforms

| Time (days) | Dairy X            | Dairy Y            | Dairy Z            |
|-------------|--------------------|--------------------|--------------------|
| 0           | 4.908 $\pm$ 0.0010 | 4.113 $\pm$ 0.0018 | 5.079 $\pm$ 0.0011 |
| 60          | 3.041 $\pm$ 0.0018 | 4.041 $\pm$ 0.0019 | 1.591 $\pm$ 0.0022 |
| 150         | 3.301 $\pm$ 0.0020 | 3.462 $\pm$ 0.0021 | 4.146 $\pm$ 0.0012 |
| 240         | 0.845 $\pm$ 0.0012 | 2.929 $\pm$ 0.0010 | 3.755 $\pm$ 0.0011 |
| 330         | 2 $\pm$ 0.0022     | 3.301 $\pm$ 0.0017 | 2.556 $\pm$ 0.0010 |

C) *Escherichia coli*

| Time (days) | Dairy X            | Dairy Y            | Dairy Z            |
|-------------|--------------------|--------------------|--------------------|
| 0           | 4.204 $\pm$ 0.0016 | 2.892 $\pm$ 0.0018 | 3.146 $\pm$ 0.0014 |
| 60          | 0.845 $\pm$ 0.0014 | 3.041 $\pm$ 0.0020 | 0.954 $\pm$ 0.0016 |
| 150         | 2.690 $\pm$ 0.0020 | 1.591 $\pm$ 0.0019 | 2.857 $\pm$ 0.0013 |
| 240         | 1.913 $\pm$ 0.0012 | 1.740 $\pm$ 0.0021 | 2.380 $\pm$ 0.0018 |
| 330         | 0.477 $\pm$ 0.0010 | 0.954 $\pm$ 0.0016 | 0.903 $\pm$ 0.0017 |

D) *Enterobacteriaceae*

| Time (days) | Dairy X            | Dairy Y            | Dairy Z            |
|-------------|--------------------|--------------------|--------------------|
| 0           | 4.826 $\pm$ 0.0011 | 4.880 $\pm$ 0.0019 | 5.079 $\pm$ 0.0010 |
| 60          | 2 $\pm$ 0.0023     | 4.146 $\pm$ 0.0011 | 2.041 $\pm$ 0.0018 |
| 150         | 2.863 $\pm$ 0.0015 | 3.477 $\pm$ 0.0010 | 4.176 $\pm$ 0.0015 |
| 240         | 0.903 $\pm$ 0.0018 | 2.908 $\pm$ 0.0002 | 3.176 $\pm$ 0.0014 |
| 330         | 2.204 $\pm$ 0.0018 | 3.301 $\pm$ 0.0019 | 2.740 $\pm$ 0.0011 |

E) Lactic acid bacteria

| Time (days) | Dairy X            | Dairy Y            | Dairy Z            |
|-------------|--------------------|--------------------|--------------------|
| 0           | 6.255 $\pm$ 0.0015 | 6.602 $\pm$ 0.0019 | 7.518 $\pm$ 0.0009 |
| 60          | 5.963 $\pm$ 0.0018 | 5.954 $\pm$ 0.0016 | 4.591 $\pm$ 0.0019 |
| 150         | 5.732 $\pm$ 0.0019 | 5.204 $\pm$ 0.0017 | 4.812 $\pm$ 0.0020 |
| 240         | 5.612 $\pm$ 0.0020 | 4.913 $\pm$ 0.0019 | 5.322 $\pm$ 0.0018 |
| 330         | 4.954 $\pm$ 0.0016 | 5.380 $\pm$ 0.0021 | 4.954 $\pm$ 0.0017 |

## F) Coagulase-positive staphylococci

| Time (days) | Dairy X        | Dairy Y        | Dairy Z        |
|-------------|----------------|----------------|----------------|
| 0           | 0.845 ± 0.0013 | 0.903 ± 0.0016 | 2.204 ± 0.0015 |
| 60          | 0.903 ± 0.0018 | 1.544 ± 0.0015 | 1.806 ± 0.0011 |
| 150         | 1.653 ± 0.0019 | 0.845 ± 0.0011 | 1.653 ± 0.0016 |
| 240         | 0.778 ± 0.0019 | 1.556 ± 0.0009 | 1.591 ± 0.0018 |
| 330         | 0.698 ± 0.0011 | 0.698 ± 0.0007 | 1.579 ± 0.0010 |

G) *Pseudomonas* spp.

| Time (days) | Dairy X        | Dairy Y        | Dairy Z        |
|-------------|----------------|----------------|----------------|
| 0           | 1.977 ± 0.0010 | 1.991 ± 0.0018 | 4.041 ± 0.0019 |
| 60          | 1.982 ± 0.0018 | 2.146 ± 0.0015 | 3.041 ± 0.0023 |
| 150         | 1.986 ± 0.0011 | 3.612 ± 0.0020 | 3.342 ± 0.0020 |
| 240         | 1.991 ± 0.0019 | 3.556 ± 0.0015 | 3.939 ± 0.0010 |
| 330         | 2.204 ± 0.0015 | 3.785 ± 0.0017 | 3.113 ± 0.0017 |

## H) Psychrotrophic

| Time (days) | Dairy X        | Dairy Y        | Dairy Z        |
|-------------|----------------|----------------|----------------|
| 0           | 5.079 ± 0.0010 | 5.491 ± 0.0017 | 4.857 ± 0.0009 |
| 60          | 4.079 ± 0.0010 | 2.832 ± 0.0019 | 4.556 ± 0.0010 |
| 150         | 4.230 ± 0.0019 | 2.599 ± 0.0009 | 4.361 ± 0.0019 |
| 240         | 3.740 ± 0.0020 | 4.462 ± 0.0013 | 5.230 ± 0.0020 |
| 330         | 5.041 ± 0.0022 | 1.995 ± 0.0008 | 5.176 ± 0.0016 |

## I) Yeasts

| Time (days) | Dairy X        | Dairy Y        | Dairy Z        |
|-------------|----------------|----------------|----------------|
| 0           | 5.113 ± 0.0016 | 2.491 ± 0.0020 | 3.579 ± 0.0010 |
| 60          | 5.146 ± 0.0012 | 2.544 ± 0.0017 | 2.799 ± 0.0010 |
| 150         | 5.477 ± 0.0010 | 2.542 ± 0.0019 | 2.806 ± 0.0012 |
| 240         | 3.968 ± 0.0009 | 2.525 ± 0.0012 | 2.591 ± 0.0022 |
| 330         | 3.949 ± 0.0007 | 2.505 ± 0.0015 | 2.653 ± 0.0020 |

## J) Moulds

| Time (days) | Dairy X        | Dairy Y        | Dairy Z        |
|-------------|----------------|----------------|----------------|
| 0           | 3 ± 0.0025     | 1.556 ± 0.0015 | 1.995 ± 0.0012 |
| 60          | 1.991 ± 0.0019 | 1.963 ± 0.0017 | 1.991 ± 0.0017 |
| 150         | 1.977 ± 0.0015 | 1.959 ± 0.0012 | 2.690 ± 0.0021 |
| 240         | 2.597 ± 0.0011 | 1.954 ± 0.0016 | 2.681 ± 0.0020 |
| 330         | 1.991 ± 0.0020 | 1.929 ± 0.0010 | 1.977 ± 0.0012 |
